# Supplementary material
Source: MDPI journal article supplement (https://www.mdpi.com/2075-5309/14/4/935)
Supplement: s1 [file s1 › buildings-2899040-supplementary.pdf]

## Supplementary Material: Workshop survey

### Introduction

Circular economy (CE) concepts are gaining attention across various fields, but implementation in the construction industry is slow due to complex production processes, supply chains, and specific industrial characteristics requiring extensive resource integration. For companies in this sector, adopting CE practices becomes meaningful when they perceive a transition to CE business models that align with growth and value-driven competitiveness. The most common CE strategies, such as reduce, reuse, and recycle, should not be viewed as an exhaustive list. It is crucial to review CE strategies at multiple levels of the building life cycle.

The objectives of this study are to identify and rank the most relevant CE strategies associated with building life cycle stages, as perceived by European-based stakeholders who participated in the CircularB workshop, “Creating a Roadmap towards Circularity in the Built Environment – State-of-the-Art.” Participation in this survey is voluntary, and responses will be confidential. It should take approximately 10 minutes to complete.

This survey is part of the Second Part of CircularB Workshop 1 in Cordoba, Spain, supported by the European Cooperation in Science and Technology (COST). COST provides networking opportunities for researchers and innovators across Europe, promoting collaboration and knowledge exchange in various scientific fields. The views expressed in this survey are those of the participants and do not necessarily reflect the official policy or position of COST. For more information about COST Action CircularB, please visit <https://circularb.eu/>. If you have any questions or require further information, please feel free to reach out to the PI directly at [ferhat.karaca@nu.edu.kz](mailto:ferhat.karaca@nu.edu.kz) or to the CircularB Action Secretariat at [ca21103@civil.uminho.pt](mailto:ca21103@civil.uminho.pt).

If you agree to respond to the survey, please continue. If you disagree, please withdraw.

# Part I: Demographic characteristics

**Q1:** Please select the option that corresponds to your age group:

- 20-29
- 30-39
- 40-49
- 50-59
- 50-59
- 60+

**Q2:** Please select your gender:

- Male
- Female
- Not specified

**Q3:** What is your highest level of education?

- Secondary education
- Bachelor's degree
- Master's degree
- Doctorate degree

**Q4:** Which stakeholder role do you believe best represents you?

- Academician/Researcher
- Client and/or Investor
- Project manager
- Material supplier
- Manufacturer
- Technician and/or Engineer
- Designer Architect and/or Engineer
- Contractor
- End-user
- Government and/or Councilor
- Urban designer
- Environmental agency
- Other, please specify.

**Q5:** How many years have you worked in the construction industry?

- <5 years
- 5-10 years
- 11-15 years
- 16-20 years
- >20 years

**Q6:** Have you ever been involved in the implementation of CE concepts?

- Yes
- No
- Don't know.

## Part II: The importance of CE strategies in different levels of building life cycle

Please rate the importance of the following CE strategies for constructing CE buildings:

| 1-Not important at all |                                                                                | 2-Slightly important | 3-Neutral | 4-Important | 5-Extremely important |   |   |   |
|------------------------|--------------------------------------------------------------------------------|----------------------|-----------|-------------|-----------------------|---|---|---|
| Planning & Design      |                                                                                |                      |           |             |                       |   |   |   |
| Q7                     | Building material bank and passport                                            |                      |           | 1           | 2                     | 3 | 4 | 5 |
| Q8                     | Bio-based building materials                                                   |                      |           | 1           | 2                     | 3 | 4 | 5 |
| Q9                     | Reused building materials                                                      |                      |           | 1           | 2                     | 3 | 4 | 5 |
| Q10                    | High-strength building materials                                               |                      |           | 1           | 2                     | 3 | 4 | 5 |
| Q11                    | Modular design and method                                                      |                      |           | 1           | 2                     | 3 | 4 | 5 |
| Q12                    | BIM-based construction management                                              |                      |           | 1           | 2                     | 3 | 4 | 5 |
| Construction           |                                                                                |                      |           |             |                       |   |   |   |
| Q13                    | Adjustment of the building’s spatial configuration through minor interventions |                      |           | 1           | 2                     | 3 | 4 | 5 |
| Q14                    | Rented construction equipment                                                  |                      |           | 1           | 2                     | 3 | 4 | 5 |
| Q15                    | Building volume can be increased vertically/horizontally                       |                      |           | 1           | 2                     | 3 | 4 | 5 |
| Q16                    | Construction waste management                                                  |                      |           | 1           | 2                     | 3 | 4 | 5 |
| Operation              |                                                                                |                      |           |             |                       |   |   |   |
| Q17                    | Multifunctional design                                                         |                      |           | 1           | 2                     | 3 | 4 | 5 |
| Q18                    | Solid waste and food waste management systems                                  |                      |           | 1           | 2                     | 3 | 4 | 5 |
| Q19                    | Equipment maintenance and management                                           |                      |           | 1           | 2                     | 3 | 4 | 5 |
| Q20                    | Renewable energy systems                                                       |                      |           | 1           | 2                     | 3 | 4 | 5 |
| Q21                    | Building-scale wastewater treatment and reuse system                           |                      |           | 1           | 2                     | 3 | 4 | 5 |
| End-of-Life            |                                                                                |                      |           |             |                       |   |   |   |
| Q22                    | Deconstruction waste management                                                |                      |           | 1           | 2                     | 3 | 4 | 5 |
| Q23                    | Optimization of waste collection and transportation route                      |                      |           | 1           | 2                     | 3 | 4 | 5 |
| Q24                    | Construction waste is handed over for further use/reselling                    |                      |           | 1           | 2                     | 3 | 4 | 5 |
| Q25                    | Demolition waste minimization                                                  |                      |           | 1           | 2                     | 3 | 4 | 5 |

## Part III: Adoption of selected CE strategies on current/previous projects

To what degree did your company adopt the following CE strategies on current/previous projects?

| 1-This CE strategy is never adopted in projects | 2-This CE strategy is rarely used in projects (about 25%) | 3-Some (about 50%) projects use this CE strategy | 4-Most (about 75%) projects use this CE strategy | 5-This CE strategy is adopted in almost all projects |
|-------------------------------------------------|-----------------------------------------------------------|--------------------------------------------------|--------------------------------------------------|------------------------------------------------------|
|-------------------------------------------------|-----------------------------------------------------------|--------------------------------------------------|--------------------------------------------------|------------------------------------------------------|

| Planning & Design |                                                                                |   |   |   |   |   |
|-------------------|--------------------------------------------------------------------------------|---|---|---|---|---|
| Q26               | Building material bank and passport                                            | 1 | 2 | 3 | 4 | 5 |
| Q27               | Bio-based building materials                                                   | 1 | 2 | 3 | 4 | 5 |
| Q28               | Reused building materials                                                      | 1 | 2 | 3 | 4 | 5 |
| Q29               | High-strength building materials                                               | 1 | 2 | 3 | 4 | 5 |
| Q30               | Modular design and method                                                      | 1 | 2 | 3 | 4 | 5 |
| Q31               | BIM-based construction management                                              | 1 | 2 | 3 | 4 | 5 |
| Construction      |                                                                                |   |   |   |   |   |
| Q32               | Adjustment of the building's spatial configuration through minor interventions | 1 | 2 | 3 | 4 | 5 |
| Q33               | Rented construction equipment                                                  | 1 | 2 | 3 | 4 | 5 |
| Q34               | Building volume can be increased vertically/horizontally                       | 1 | 2 | 3 | 4 | 5 |
| Q35               | Construction waste management                                                  | 1 | 2 | 3 | 4 | 5 |
| Operation         |                                                                                |   |   |   |   |   |
| Q36               | Multifunctional design                                                         | 1 | 2 | 3 | 4 | 5 |
| Q37               | Solid waste and food waste management systems                                  | 1 | 2 | 3 | 4 | 5 |
| Q38               | Equipment maintenance and management                                           | 1 | 2 | 3 | 4 | 5 |
| Q39               | Renewable energy systems                                                       | 1 | 2 | 3 | 4 | 5 |
| Q40               | Building-scale wastewater treatment and reuse system                           | 1 | 2 | 3 | 4 | 5 |
| End-of-Life       |                                                                                |   |   |   |   |   |
| Q41               | Deconstruction waste management                                                | 1 | 2 | 3 | 4 | 5 |
| Q42               | Optimization of waste collection and transportation route                      | 1 | 2 | 3 | 4 | 5 |
| Q43               | Construction waste is handed over for further use/reselling                    | 1 | 2 | 3 | 4 | 5 |
| Q44               | Demolition waste minimization                                                  | 1 | 2 | 3 | 4 | 5 |
